# Supplementary material
Source: PubMed Central journal article supplement (PMC6656604)
Supplement: NIHMS1526904-supplement-1.pdf [file NIHMS1526904-supplement-1.pdf]

## Supplementary Information for

### **Microfluidic-based transcriptomics reveal force-independent bacterial rheosensing**

Joseph E. Sanfilippo<sup>a,1</sup>, Alexander Lorestani<sup>a,1</sup>, Matthias D. Koch<sup>a,b</sup>, Benjamin P. Bratton<sup>a,b</sup>, Albert Siryaporn<sup>a,c,d</sup>, Howard A. Stone<sup>e</sup>, Zemer Gitai<sup>a,2</sup>

<sup>a</sup>Department of Molecular Biology, Princeton University, Princeton, NJ 08544

<sup>b</sup>Lewis-Sigler Institute for Integrative Genomics, Princeton University, Princeton, NJ 08544

<sup>c</sup>Department of Molecular Biology and Biochemistry, University of California, Irvine, Irvine, CA 92697

<sup>d</sup>Department of Physics and Astronomy, University of California, Irvine, Irvine, CA 92697

<sup>e</sup>Department of Mechanical and Aerospace Engineering, Princeton University, Princeton, NJ 08544

<sup>1</sup>These authors contributed equally.

<sup>2</sup>To whom correspondence should be addressed. Email: [zgitai@princeton.edu](mailto:zgitai@princeton.edu)

#### **This includes:**

Supplementary Figures 1 to 11

Supplementary Tables 3 to 5

Supplementary references

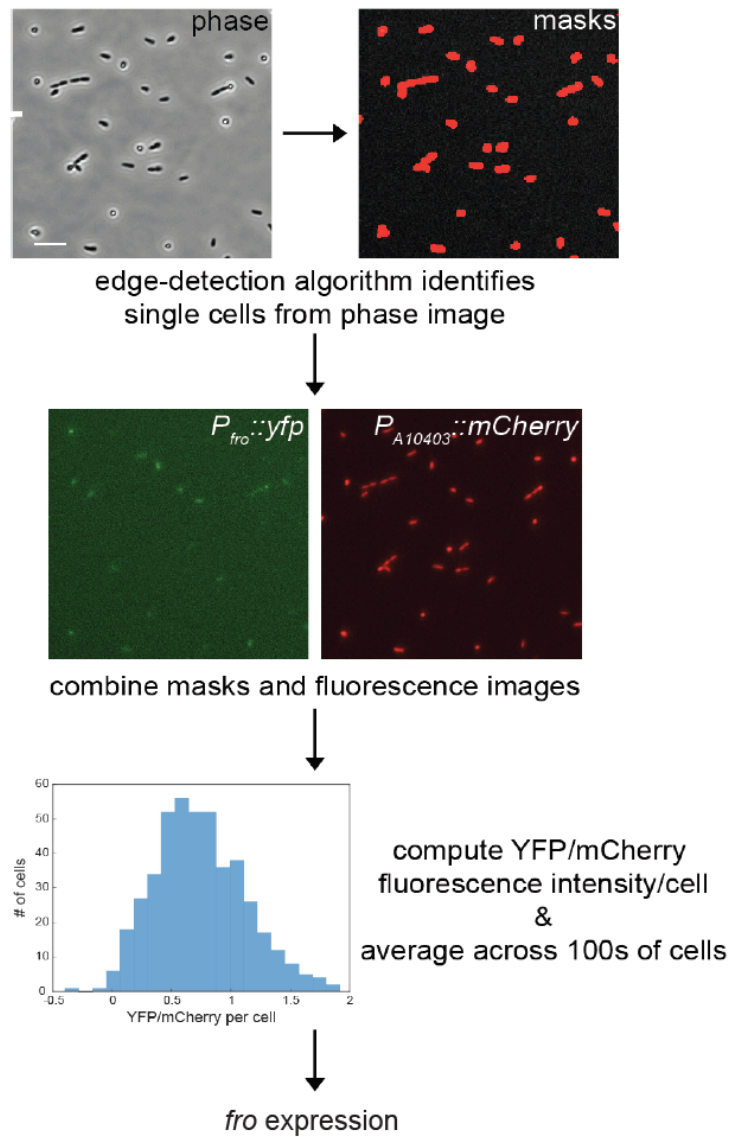

**Supplementary Figure 1: Image analysis pipeline for quantification of *fro* expression.** First, an edge detection algorithm is applied to phase contrast images to build cell masks. Then, the fluorescence within each mask is measured from the corresponding YFP and mCherry images. Scale bar indicates 5  $\mu$ m. The YFP/mCherry fluorescence ratio per cell is computed and averaged across hundreds of cells. *fro* expression is represented as the population's average cellular YFP/mCherry ratio.

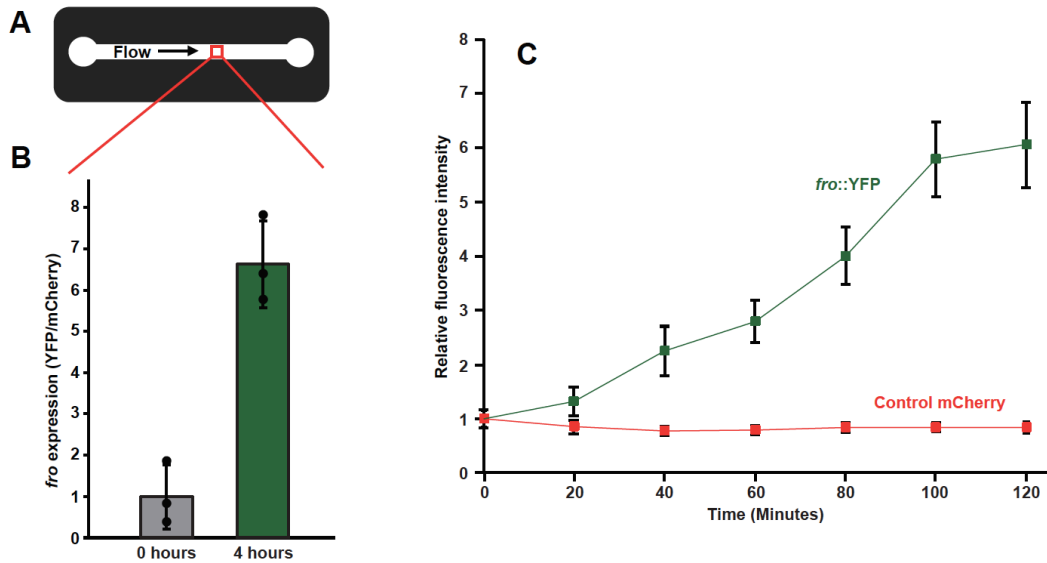

**Supplementary Figure 2: Flow induces *fro* expression approximately 7-fold. (A)**

Schematic depicting the view from above the microchannel used in B. These channels are 50  $\mu\text{m}$  tall by 500  $\mu\text{m}$  wide. (B) *fro* expression of cells before flow (0 hours) and after 4 hours of flow (4 hours) at a shear rate of  $800 \text{ sec}^{-1}$ . *fro* expression at 0 hours was set to 1. Raw images shown in Figure 1E. Error bars show SD of three independent replicates and points indicate values for each replicate. (C) Fluorescence intensity of YFP channel (in green) and mCherry channel (in red) for cells exposed to a shear rate of  $800 \text{ sec}^{-1}$ . YFP and mCherry intensity at 0 minutes set to 1. Error bars represent the SEM of 30 cells for each data point.

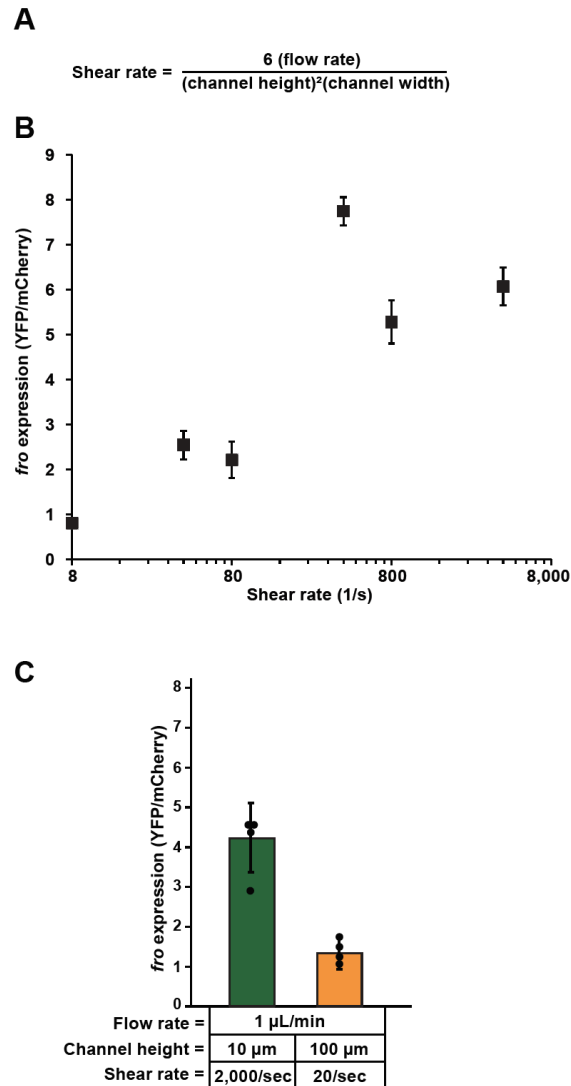

**Supplementary Figure 3: Shear rate tunes *fro* expression.** (A) Equation showing the relationship between shear rate, flow rate and channel dimensions. (B) *fro* expression after cells were subjected to flow at shear rates of 8-4,000 sec<sup>-1</sup> (flow rates ranging from 0.1 to 50 µl/min) in a 50 µm tall channel for 2 hours. (C) *fro* expression after cells were subjected to flow at shear rates of 2,000 sec<sup>-1</sup> or 20 sec<sup>-1</sup> (channel heights of 10 µm or 100 µm) at a flow rate of 1 µl/min for 2 hours. *fro* expression in 10 µm or 100 µm tall channels are significantly different with P=0.005, calculated by a 2-sided T-test. *fro* expression is quantified by the ratio of YFP to mCherry fluorescence across a population of single cells. *fro* expression with no flow was set to 1. Error bars in B represent SEM of three independent replicates. Error bars in C represent SD of four independent replicates.

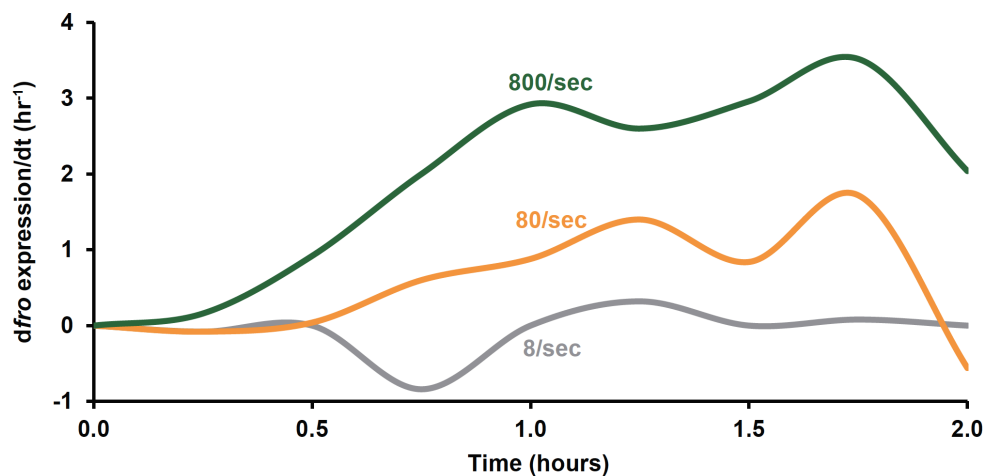

**Supplementary Figure 4: Shear rate tunes *fro* induction kinetics.** The first derivative of the *fro* induction curve presented in Fig. 2B, calculated by the change in *fro* expression ( $dfro$  expression) divided by change in time ( $dt$ ). The derivative is represented in change per hour. The data presented is an average of three independent replicates. *fro* expression for this experiment was measured over 2 hours of time in the presence of 8 (gray line), 80 (yellow line), and 800  $\text{sec}^{-1}$  (green line) shear rates.

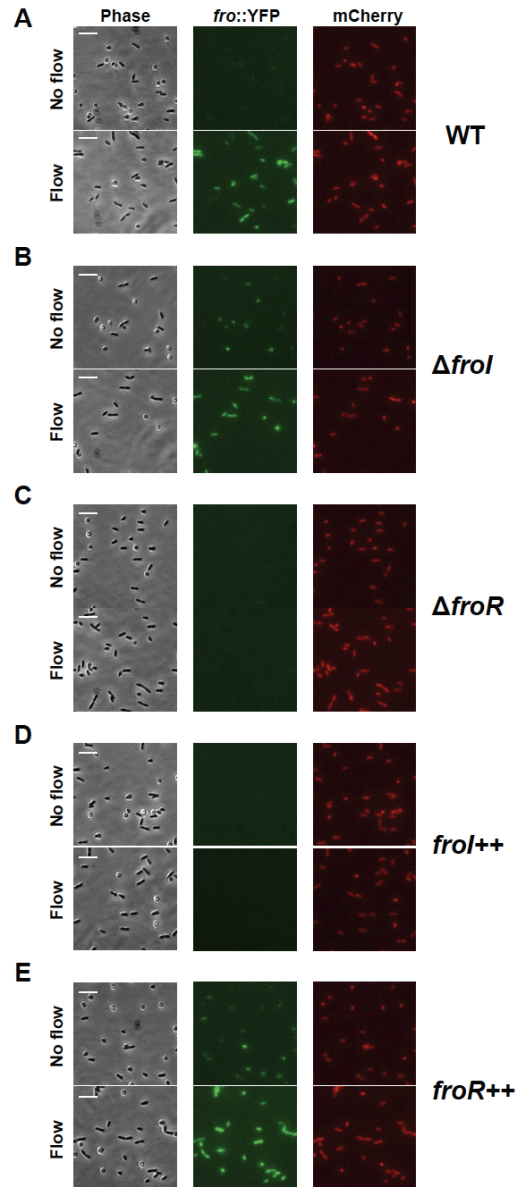

**Supplementary Figure 5: The sigma factor FroR and anti-sigma factor Frol regulate *fro* expression.** (A-E) Images of cells either before flow (No flow) or after being exposed to flow (Flow) at a shear rate of  $800 \text{ sec}^{-1}$  for 120 min. Left images show the phase contrast channel, middle images show the YFP channel, and right images show the mCherry channel. All strains have the *fro::YFP* reporter and a constitutively expressed mCherry reporter. (A) shows wild-type (WT) cells, (B) shows a  $\Delta frol$  mutant, (C) shows a  $\Delta froR$  mutant, (D) shows a *frol*<sup>++</sup> overexpression strain, and (E) shows a *froR*<sup>++</sup> overexpression strain. Scale bars indicate 5  $\mu\text{m}$ . Images are representative of three independent replicates.

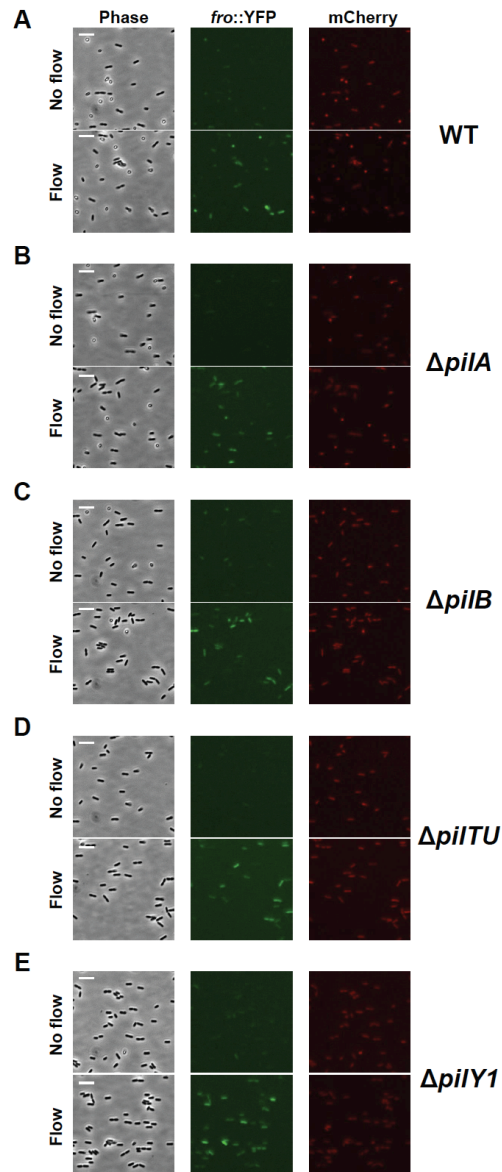

**Supplementary Figure 6: Known bacterial surface sensors do not regulate *fro* expression.** (A-E) Images of cells either before flow (No flow) or after being exposed to flow (Flow) at a shear rate of  $800 \text{ sec}^{-1}$  for 120 min. Left images show the phase contrast channel, middle images show the YFP channel, and right images show the mCherry channel. All strains have the *fro*::YFP reporter and a constitutively expressed mCherry reporter. (A) shows wild-type (WT) cells, (B) shows a  $\Delta pilA$  mutant, (C) shows a  $\Delta pilB$  mutant, (D) shows a  $\Delta pilTU$  mutant, and (E) shows a  $\Delta pilY1$  mutant. Scale bars indicate 5  $\mu\text{m}$ . Images are representative of three independent replicates.

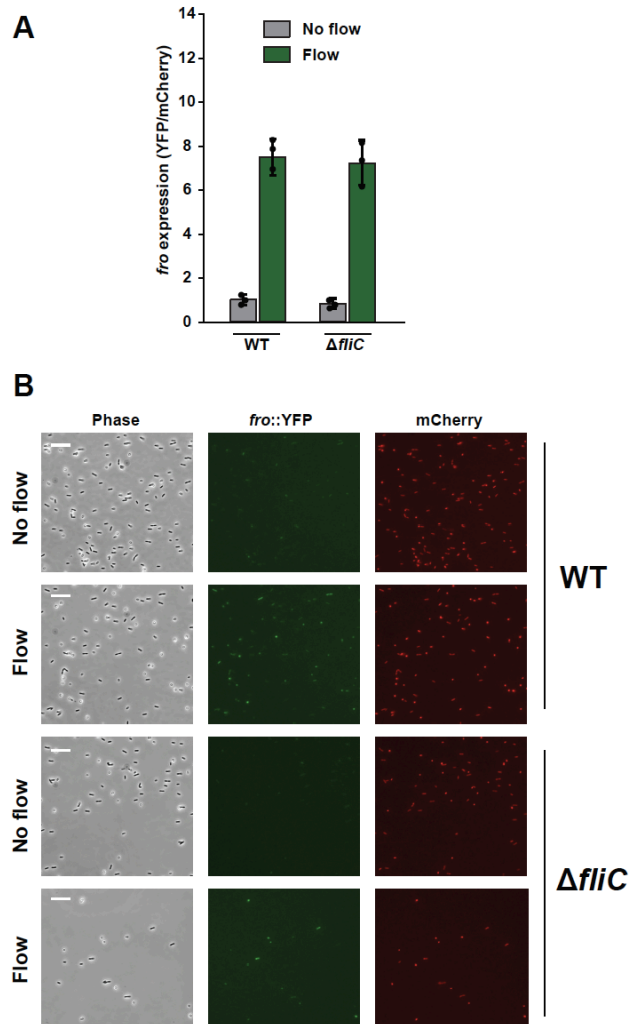

**Supplementary Figure 7: The flagellum is not required for *fro* induction.** (A) *fro* expression levels in wild-type cells and  $\Delta fliC$  mutant cells either subjected to no flow (gray bars) or 2 hours of flow at a shear rate of  $400 \text{ sec}^{-1}$  (green bars). *fro* expression in no flow for WT is normalized to 1. Error bars show SD of three independent replicates and points indicate values for each replicate. Channels used these experiments were  $50 \mu\text{m}$  tall by  $500 \mu\text{m}$  wide. (B) Images of WT and  $\Delta fliC$  mutant cells either before flow (No flow) or after being exposed to flow (Flow) at a shear rate of  $800 \text{ sec}^{-1}$  for 2 hours. Left images show the phase contrast channel, middle images show the YFP channel, and right images show the mCherry channel. Scale bars indicate  $10 \mu\text{m}$ . Images are representative of three independent replicates.



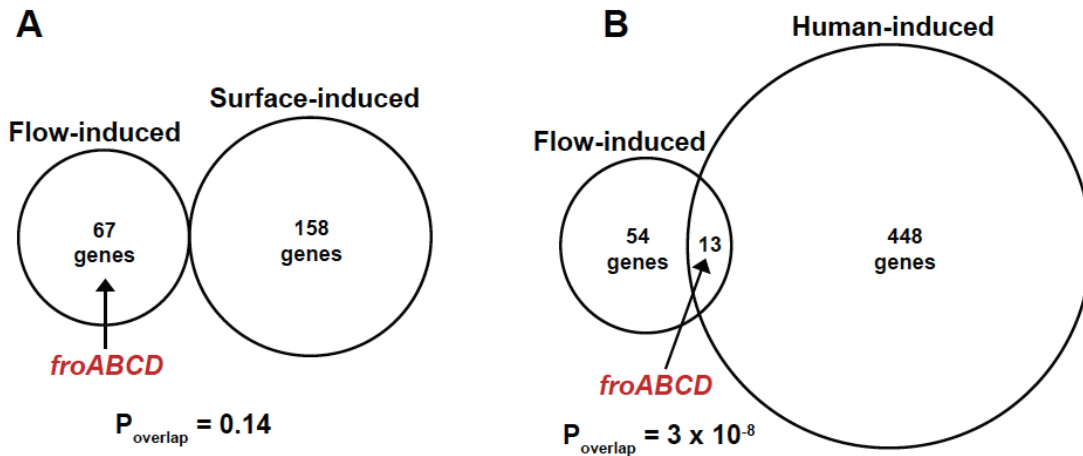

**Supplementary Figure 8: The flow-induced transcriptome is distinct from the surface-induced transcriptome and includes genes induced during human infection.** (A) Overlap of flow-induced genes at 4 hours and surface-induced genes from (16). (B) Overlap of flow-induced genes at 4 hours and genes induced at least 3-fold during human infection from (25). *froABCD* genes are induced by flow and human infection, but not by surface attachment. P-values were calculated using the hypergeometric distribution and represent the likelihood that the overlap of datasets is due to chance.

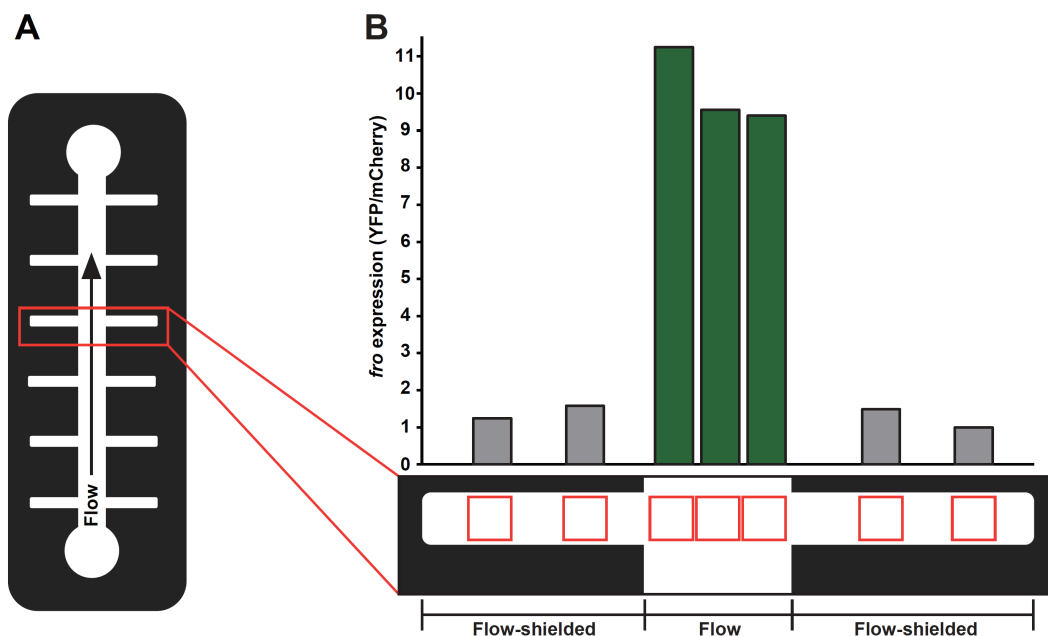

**Supplementary Figure 9: Surface attached cells in flow-shielded regions of a channel do not induce *fro* expression.** Schematic depicting the view from above the microchannel used with flow-shielded inlets. These channels are 50  $\mu\text{m}$  tall by 500  $\mu\text{m}$  wide. (B) Quantification of *fro* expression from cells at different positions along the channel after 4 hours of flow at a shear rate of 800  $\text{sec}^{-1}$ . Raw images shown in Figure 4B. The 7 bars on the graph correspond to quantification of cells found in locations of the 7 red squares shown in the schematic below the bar graph. The schematic is a zoomed in portion of A highlighted with the red square. *fro* expression of cells before flow treatment is set to 1.

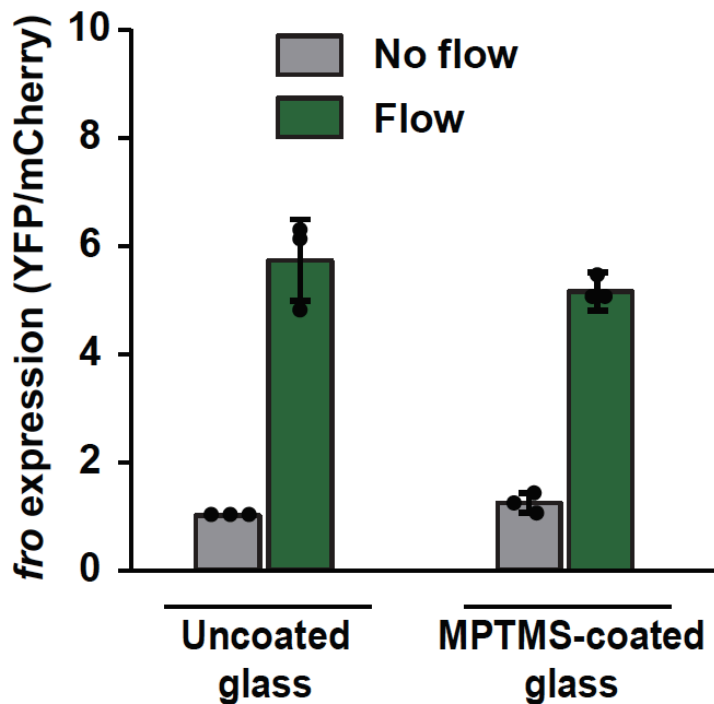

**Supplementary Figure 10: Rheosensing is not affected by thiol coating of the channel surface.** Quantification of *fro* expression from wild-type cells in uncoated channels or channels coated with MPTMS (3-Mercaptopropyl trimethoxysilane). MPTMS was previously shown to increase adhesion between *P. aeruginosa* and the channel surface (20). Cells before (gray) or after (green) 2 hours of flow at a shear rate of  $800 \text{ sec}^{-1}$ . *fro* expression for WT no flow was set to 1. Error bars show SD of three independent replicates and points indicate values for each replicate.

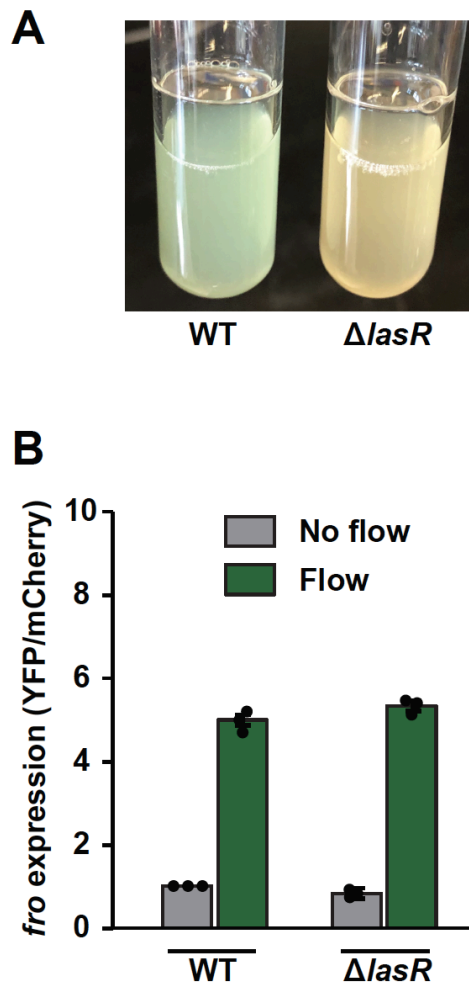

**Supplementary Figure 11: Rheosensing is not controlled by canonical quorum sensing.** (A) Color phenotypes of cell cultures showing wild-type (WT) cells with blue-green color due to phenazines and  $\Delta lasR$  mutant cells lacking pigments. (B) Quantification of *fro* expression from wild-type and  $\Delta lasR$  mutant cells in no flow (gray) or after 2 hours of flow at a shear rate of  $800 \text{ sec}^{-1}$  (green). *fro* expression for WT no flow was set to 1. Error bars show SD of three independent replicates and points indicate values for each replicate.

Table S3. Strains used in this study.

| Strain               | Description                                                                                 | Reference   |
|----------------------|---------------------------------------------------------------------------------------------|-------------|
| <i>E. coli</i>       |                                                                                             |             |
| S17-1                | wild-type; used for cloning and conjugation                                                 | (33)        |
| <i>P. aeruginosa</i> |                                                                                             |             |
| PA14                 | wild-type; clinical isolate from a burn wound                                               | (34)        |
| AL143                | PA14 <i>fro::yfp attB::[P<sub>A1/04/03</sub>-mCherry]</i>                                   | This study. |
| AL297                | PA14 <i>fro::yfp attB::[P<sub>A1/04/03</sub>-mCherry] ΔpilA aacc1::FRT</i>                  | This study. |
| AL180                | PA14 <i>fro::yfp attB::[P<sub>A1/04/03</sub>-mCherry] ΔpilB aacc1::FRT</i>                  | This study. |
| AL169                | PA14 <i>fro::yfp attB::[P<sub>A1/04/03</sub>-mCherry] ΔpilTU aacc1::FRT</i>                 | This study. |
| AL174                | PA14 <i>fro::yfp attB::[P<sub>A1/04/03</sub>-mCherry] ΔpilY1 aacc1::FRT</i>                 | This study. |
| AL175                | PA14 <i>fro::yfp attB::[P<sub>A1/04/03</sub>-mCherry] ΔlasR aacc1::FRT</i>                  | This study. |
| AL452                | PA14 <i>P<sub>fro</sub>::yfp attB::[P<sub>A1/04/03</sub>-mCherry] ΔfliC aacc1::FRT</i>      | This study. |
| AL325                | PA14 <i>fro::yfp attB::[P<sub>A1/04/03</sub>-mCherry] ΔfroR aacc1</i>                       | This study. |
| AL350                | PA14 <i>P<sub>fro</sub>::yfp attB::[P<sub>A1/04/03</sub>-mCherry] Δfrol aacc1</i>           | This study. |
| AL369                | PA14 <i>fro::yfp attB::[P<sub>A1/04/03</sub>-mCherry] glmS::[P<sub>A1/04/03</sub>-froR]</i> | This study. |
| AL370                | PA14 <i>fro::yfp attB::[P<sub>A1/04/03</sub>-mCherry] glmS::[P<sub>A1/04/03</sub>-frol]</i> | This study. |

**Table S4: Primers used in this study.**

| <b>Primer</b>                | <b>Sequence</b>                                                  | <b>Reference</b> |
|------------------------------|------------------------------------------------------------------|------------------|
| <i>fro</i> -reporter-lred-u1 | GCATCCGAAGTCGAGGAGAA                                             | This study.      |
| <i>fro</i> -reporter-lred-l1 | cttaatttctcctttaattctagCTCCTCAGGCCTTACGACTT                      | This study.      |
| <i>fro</i> -reporter-lred-u2 | AAGTCGTAAGGCCTGAGGAGctagaattaaagaggagaaattaag                    | This study.      |
| <i>fro</i> -reporter-lred-l2 | ATTCCCGTTGCATGGTCCGTtgtaggctggagctgcttcg                         | This study.      |
| <i>fro</i> -reporter-lred-u3 | cgaagcagctccagcctacaACGGACCATGCAACGGGAAT                         | This study.      |
| <i>fro</i> -reporter-lred-l3 | GCAATCGGCTTCCTCCAGTA                                             | This study.      |
| <i>pilA</i> -lred-u1         | AGGAACTCGGTTTTCTCCGC                                             | This study.      |
| <i>pilA</i> -lred-l1         | cgaagcagctccagcctacaGCTCCGAGCGAATGCCGCTAA                        | This study.      |
| <i>pilA</i> -lred-u2         | TTAGCGGCATTTCGCTCGGAGCtgtaggctggagctgcttcg                       | This study.      |
| <i>pilA</i> -lred-l2         | GGATATATCAATGGAGAGATACATGattccggggatccgtcgacc                    | This study.      |
| <i>pilA</i> -lred-u3         | ggtcgacggatccccggaatCATGTATCTCTCCATTGATATATCC                    | This study.      |
| <i>pilA</i> -lred-l3         | CGCAGTAGGCGATACCGAAT                                             | This study.      |
| <i>pilB</i> -lred-u1         | TACCGGCTTGAGCATTCCAG                                             | This study.      |
| <i>pilB</i> -lred-l1         | ggtcgacggatccccggaatCATTGGGAGTGGTGCATAAGG                        | This study.      |
| <i>pilB</i> -lred-u2         | CCTTATGCGACCACTCCCAATGattccggggatccgtcgacc                       | This study.      |
| <i>pilB</i> -lred-l2         | TTAGTCCTTGGTCACGCGGTTtgtaggctggagctgcttcg                        | This study.      |
| <i>pilB</i> -lred-u3         | cgaagcagctccagcctacaAACCGCGTGACCAAGGACTAA                        | This study.      |
| <i>pilB</i> -lred-l3         | TGGCTTTCAGGGATTCTGTCT                                            | This study.      |
| <i>pilTU</i> -lred-u1        | GGAGGTTGGGCAGTTGCTTC                                             | This study.      |
| <i>pilTU</i> -lred-l3        | TATCCTCTACGCGACCTACG                                             | This study.      |
| <i>pilY1</i> -lred-u1        | ACTGGAAAGCCGTATCAC                                               | This study.      |
| <i>pilY1</i> -lred-l1        | CATGCGCTGGCTCCAGTCAG                                             | This study.      |
| <i>pilY1</i> -lred-u2        | CATGCACGCCTGTATACCAACTGACTGGAGCCAGCGCATG<br>attccggggatccgtcgacc | This study.      |
| <i>pilY1</i> -lred-l2        | AGACGTAAGGGGTTTCATGTTTCTCCTCGACGACCCGt<br>gtaggctggagctgcttcg    | This study.      |
| <i>pilY1</i> -lred-u3        | CGGGTCGTCGAGGAGAAATG                                             | This study.      |
| <i>pilY1</i> -lred-l3        | GTTGAATGCCTGGTTAGC                                               | This study.      |
| <i>fliC</i> -lred-u1         | AATCGGTGAGCCTACTCCT                                              | This study.      |
| <i>fliC</i> -lred-l1         | cgaagcagctccagcctacaGTCTGAGCCTGCTGCGCTAA                         | This study.      |
| <i>fliC</i> -lred-u2         | TTAGCGCAGCAGGCTCAGGACtgtaggctggagctgcttcg                        | This study.      |
| <i>fliC</i> -lred-l2         | GGTCCTTTGGAGGAAATCACCATGattccggggatccgtcgacc                     | This study.      |
| <i>fliC</i> -lred-u3         | ggtcgacggatccccggaatCATGGTGATTTCTCCAAAGGACC                      | This study.      |
| <i>fliC</i> -lred-l3         | CTGCTATCGCGACAGTCTCC                                             | This study.      |
| <i>lasR</i> -lred-l3         | GAGAATTCGCCAGCAACCGA                                             | This study.      |
| <i>lasR</i> -lred-u1         | TACGCGCCGCCGTTGCAGGC                                             | This study.      |
| Tn7- <i>froR</i> -u          | ttaaagaggagaaattaagcGTGGCGGCGCCTACCGAC                           | This study.      |
| Tn7- <i>froR</i> -l          | aggaattcctcgagaagctTCAGCATTGGCCGGTCTCC                           | This study.      |
| Tn7- <i>froI</i> -u          | ttaaagaggagaaattaagcATGCTGAGTTGCAAGGAACTGGTCC<br>CCC             | This study.      |
| Tn7- <i>froI</i> -l          | aggaattcctcgagaagctTCAGCGCCGCGCGGCGTC                            | This study.      |

|                              |                                           |             |
|------------------------------|-------------------------------------------|-------------|
| Tn7-PA1/04/03-<br>insert-v-l | AAGCTTCTCGAGGAATTCCTG                     | This study. |
| Tn7-PA1/04/03-<br>insert-v-u | GCTTAATTTCTCCTCTTTAATTCTAG                | This study. |
| <i>froR</i> -lred-u1         | CTGCTGACCCAGTTCTCAA                       | This study. |
| <i>froR</i> -lred-l1         | ggtcgacggatccccggaatCACGATCAGTGTTTACGCAGG | This study. |
| <i>froR</i> -lred-u2         | CCTGCGTAAACACTGATCGTGattccggggatccgtcgacc | This study. |
| <i>froR</i> -lred-l2         | TCAGCATTGGCCGGTCTCCTCttaggctggagctgcttcg  | This study. |
| <i>froR</i> -lred-u3         | cgaagcagctccagcctacaGAGGAGACCGGCCAATGCTGA | This study. |
| <i>froR</i> -lred-l3         | CCCTGCTGGAGAAATATCGGG                     | This study. |
| <i>froI</i> -lred-u1         | TCATCGGCAGATCGCATAACC                     | This study. |
| <i>froI</i> -lred-l1         | ggtcgacggatccccggaatACTCAGCATTGGCCGGTCTC  | This study. |
| <i>froI</i> -lred-u2         | GAGACCGGCCAATGCTGAGTattccggggatccgtcgacc  | This study. |
| <i>froI</i> -lred-l2         | GGTACCCCGGCTCAGCGttaggctggagctgcttcg      | This study. |
| <i>froI</i> -lred-u3         | cgaagcagctccagcctacaCGCTGAGCCGGGGTACC     | This study. |
| <i>froI</i> -lred-l3         | AACCTTCCTTGGCCTTCTCG                      | This study. |

**Table S5: Plasmids used in this study.**

| Plasmid                                         | Description                                                         | Reference   |
|-------------------------------------------------|---------------------------------------------------------------------|-------------|
| mini-CTX2                                       | <i>attB</i> integration vector                                      | (29)        |
| mini-CTX2-<br>P <sub>A1/04/03</sub> -mCherry    | Targets constitutively expressed mCherry allele to <i>attB</i> site | This study. |
| pAS03                                           | Vector for generating deletion mutants and fusions                  | (16)        |
| pFLP2                                           | Plasmid expressing FLP2 to recombine FRT sites                      | (35)        |
| pUCP18-RedS                                     | Lambda Red recombineering vector                                    | (27)        |
| mini-Tn7-P <sub>A1/04/03</sub> -<br><i>froR</i> | Targets constitutively expressed <i>froR</i> to <i>glmS</i>         | This study. |
| mini-Tn7-P <sub>A1/04/03</sub> -<br><i>froI</i> | Targets constitutively expressed <i>froI</i> to <i>glmS</i>         | This study. |



## Supplemental References

27. Lesic, B. & Rahme, L.G. Use of the lambda Red recombinase system to rapidly generate mutants in *Pseudomonas aeruginosa*. *BMC Molecular Biology* **9**, 20 (2008)
28. Choi, K.H. & Schweizer, H.P. mini-Tn7 insertion in bacteria with single attTn7 sites: example *Pseudomonas aeruginosa*. *Nature Protocols* **1**,153-161 (2006)
29. Hoang, T.T., Kutchma, A.J., Becher, A., & Schweizer, H.P. Integration-proficient plasmids for *Pseudomonas aeruginosa*: site-specific integration and use for engineering of reporter and expression strains. *Plasmid* **43**, 59-72 (2000)
30. Langmead, B. & Salzberg, S.L. Fast gapped-read alignment with Bowtie 2. *Nature Methods* **9**, 357-359 (2012)
31. Kim, M.K., Ingremeau, F., Zhao, A., Bassler, B.L., & Stone, H.A. Local and global consequences of flow on bacterial quorum sensing. *Nature Microbiology* **1**, 15005 (2016)
32. Koch, M.D. & Shaevitz, J.W. Introduction to Optical Tweezers. *Methods in Molecular Biology* **1486**, 3-24 (2017)
33. Simon, R., Quandt, J., & Klipp, W. New derivatives of transposon Tn5 suitable for mobilization of replicons, generation of operon fusions and induction of genes in gram-negative bacteria. *Gene* **80**, 161-169 (1989)
34. Rahme, L.G., *et al.* Common virulence factors for bacterial pathogenicity in plants and animals. *Science* **268**, 1899-1902 (1995)
35. Hoang, T.T., Karkhoff-Schweizer, R.R., Kutchma, A.J., & Schweizer, H.P. A broad-host-range Flp-FRT recombination system for site-specific excision of chromosomally-located DNA sequences: application for isolation of unmarked *Pseudomonas aeruginosa* mutants. *Gene* **212**, 77-86 (1998)
